# Supplementary material for: Self-assembly of biosurfactant–inorganic hybrid nanoflowers as efficient catalysts for degradation of cationic dyes
Source: Royal Society of Chemistry journal article supplement (doi:10.1039/c7ra06592b), 2017-01-01
Supplement: c7ra06592b1.pdf [file c7ra06592b1.pdf]

## Self-assembly of Biosurfactant-inorganic Hybrid Nanoflowers as Efficient Catalysts for Degradation of Cationic Dyes

Jianmei Jiao , Xia Xin \*, Xingang Wang, Zengchun Xie, Congxin Xia, Wei Pan

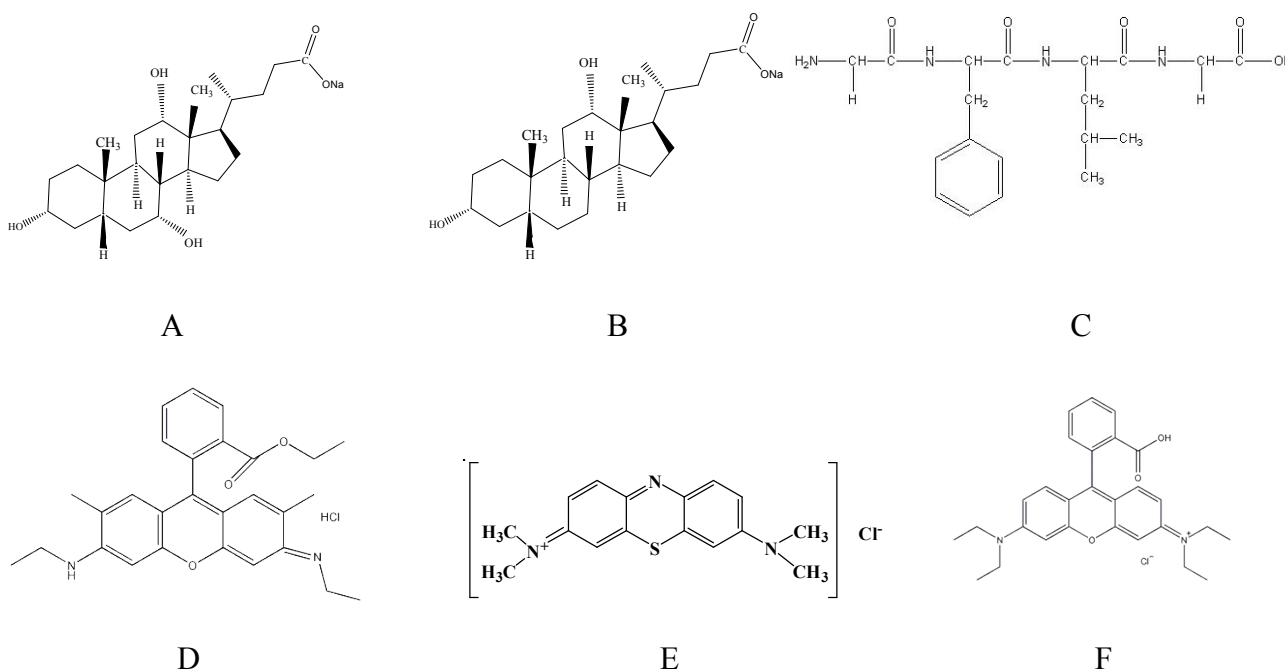

**Fig. S1** The structures of (A) Sodium cholate, (B) Sodium deoxycholate, (C) GG4 (D) Rhodamine6G, (E) Methylene blue. (F) Rhodamine B.

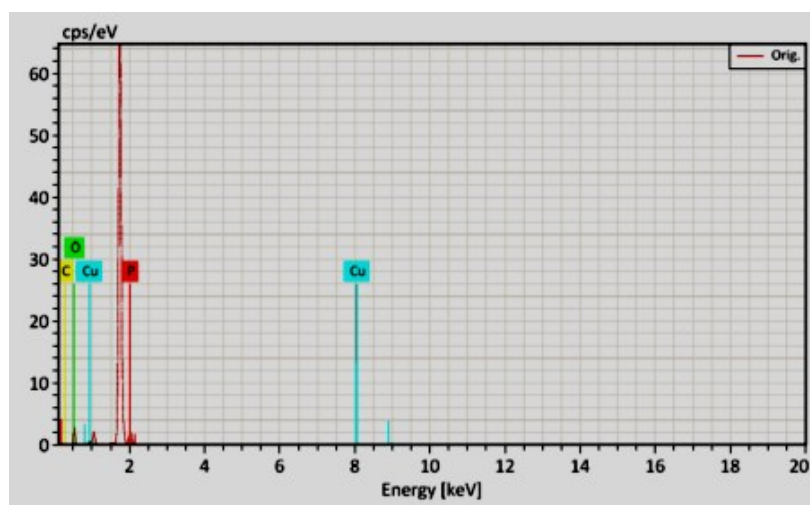

**Fig. S2** EDX pattern of SC-Cu<sub>3</sub>(PO<sub>4</sub>)<sub>2</sub>·3H<sub>2</sub>O nanoflowers .

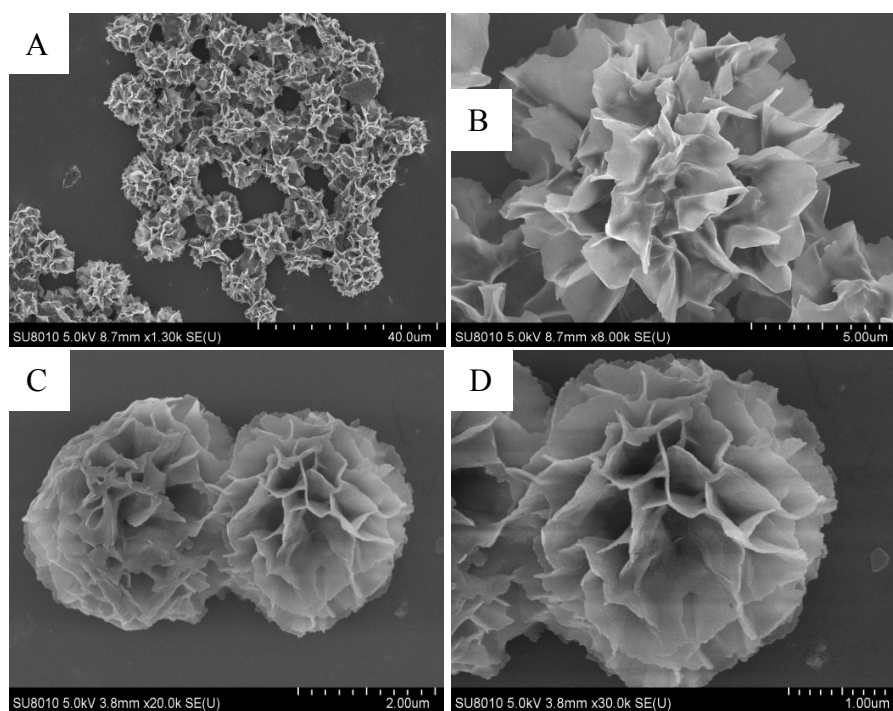

**Fig.S3** SEM images of (A, B) SDC- $\text{Cu}_3(\text{PO}_4)_2 \cdot 3\text{H}_2\text{O}$  nanoflowers, (C, D) GG-4- $\text{Cu}_3(\text{PO}_4)_2 \cdot 3\text{H}_2\text{O}$  nanoflowers.

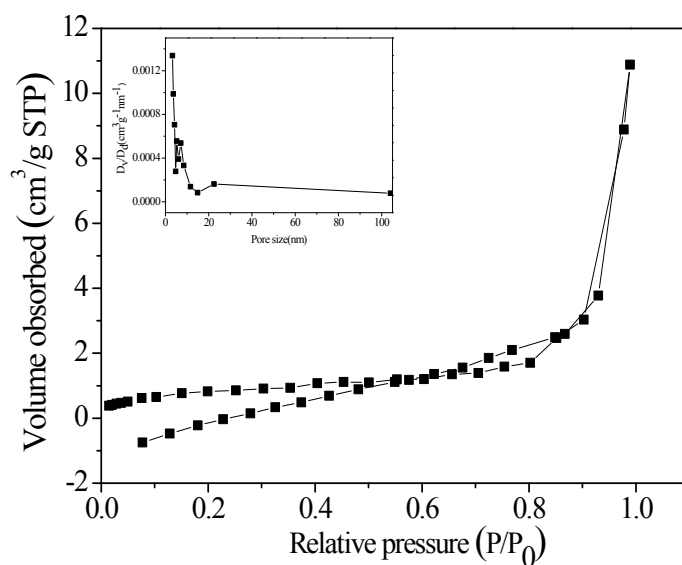

**Fig.S4** Nitrogen adsorption–desorption isotherm and the pore size distribution curve (inset) for the SC- $\text{Cu}_3(\text{PO}_4)_2 \cdot 3\text{H}_2\text{O}$  nanoflowers.

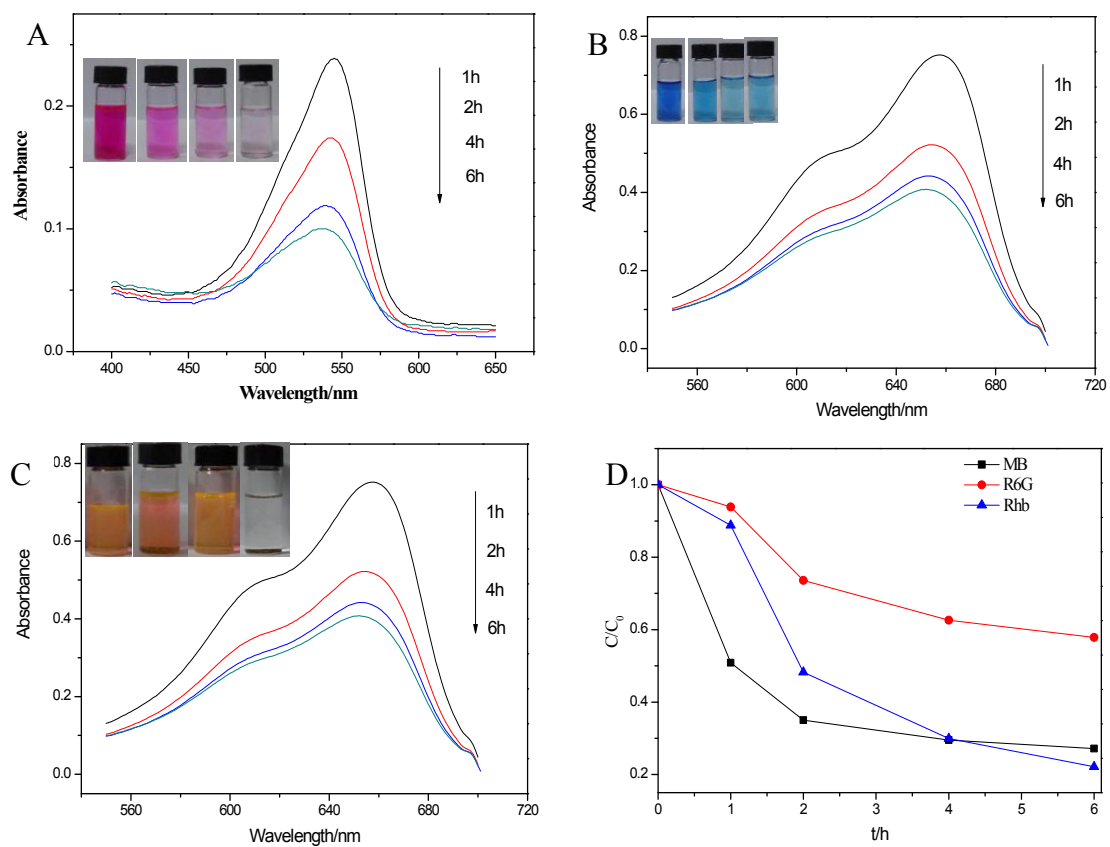

**Fig.S5** Color change of cationic dyes solution over time and the UV-Vis spectrum. RhB; (B) MB;(C)R6G,and (D) comparison of degradation rates for different dye

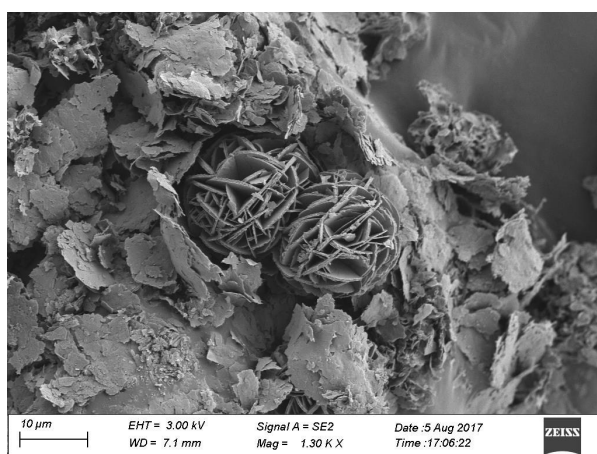

**Fig.S6** SEM images of our catalyst after degradation of dyes.

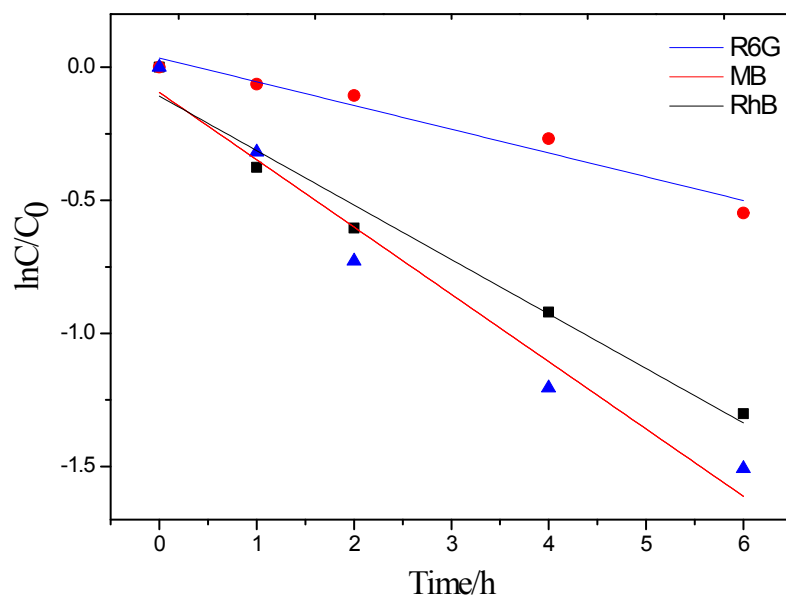

**Fig.S7** Degradation rate of the three dyes calculated by  $\ln(C_t/C_0)$  as functions of reaction time.
